# Supplementary material for: Development and characterization of lanthanide-HPDO3A-C16-based micelles as CEST-MRI contrast agents
Source: Royal Society of Chemistry journal article supplement (doi:10.1039/c8dt04621b), 2019-01-01
Supplement: c8dt04621b1.pdf [file c8dt04621b1.pdf]

## Supplementary Materials for

### Development and characterization of Lanthanide-HPDO3A-C16 based micelles as MRI contrast agents.

Giuseppe Ferrauto,<sup>a</sup> Frederik Beuprez,<sup>a,b</sup> Enza Di Gregorio,<sup>a</sup> Carla Carrera,<sup>a</sup> Silvio Aime,<sup>a</sup> Enzo Terreno,<sup>a</sup> and Daniela Delli Castelli<sup>a,\*</sup>

---

<sup>a.</sup> *Molecular Imaging Center, Department of Molecular Biotechnologies and Health Sciences, University of Torino- Via Nizza 52, 10126 Torino (IT).*

<sup>b.</sup> *Laboratory of General Biochemistry and Physical Pharmacy Department of Pharmaceutics, Ghent University, Ottergemsesteenweg 460, 9000 Gent, Belgium*

### Keywords

PARACEST agents; micelles; MRI; lanthanide; paramagnetic complex

### High resolution $^1\text{H}$ - and $^{13}\text{C}$ -NMR spectra of the HPDO3A-C16 ligand.

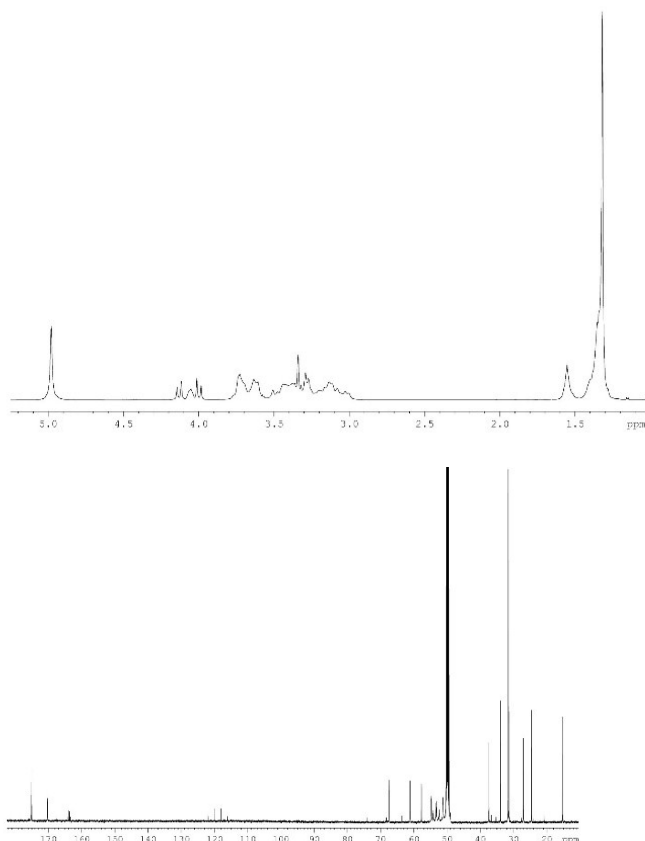

Fig.S1:  $^1\text{H}$ - and  $^{13}\text{C}$ - NMR spectra ( $B_0= 14.1\text{ T}$ ) in MeOD of HPDO3A-C16 ligand.

### High resolution $^1\text{H}$ spectra of the YbHPDO3A-C16 complex in $\text{CDCl}_3$ or $\text{D}_2\text{O}$ .

The high resolution proton spectra of Eu- and Yb- HPDO3A complexes have been acquired at 14T both for YbHPDO3A-C16 in chloroform ( $\text{CDCl}_3$ ) and in water ( $\text{D}_2\text{O}$ ) in order to have the spectra of free complex and of the complex in micelle. The obtained spectra are quite similar to those obtained for Yb-HPDO3A without the hydrophobic chain. These results suggest that the presence of the additional C16 chain does not change the structure of the chelate.

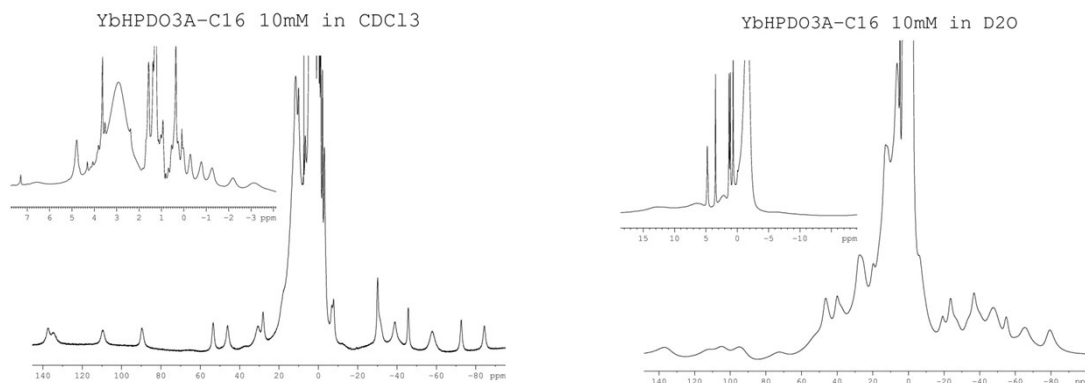

Fig.S2  $^1\text{H}$ -spectra ( $B_0= 14.1\text{T}$ ) of Yb-HPDO3A-C16 10mM in  $\text{CDCl}_3$  (left) or in  $\text{D}_2\text{O}$  (right), pH 7.0, 298K.

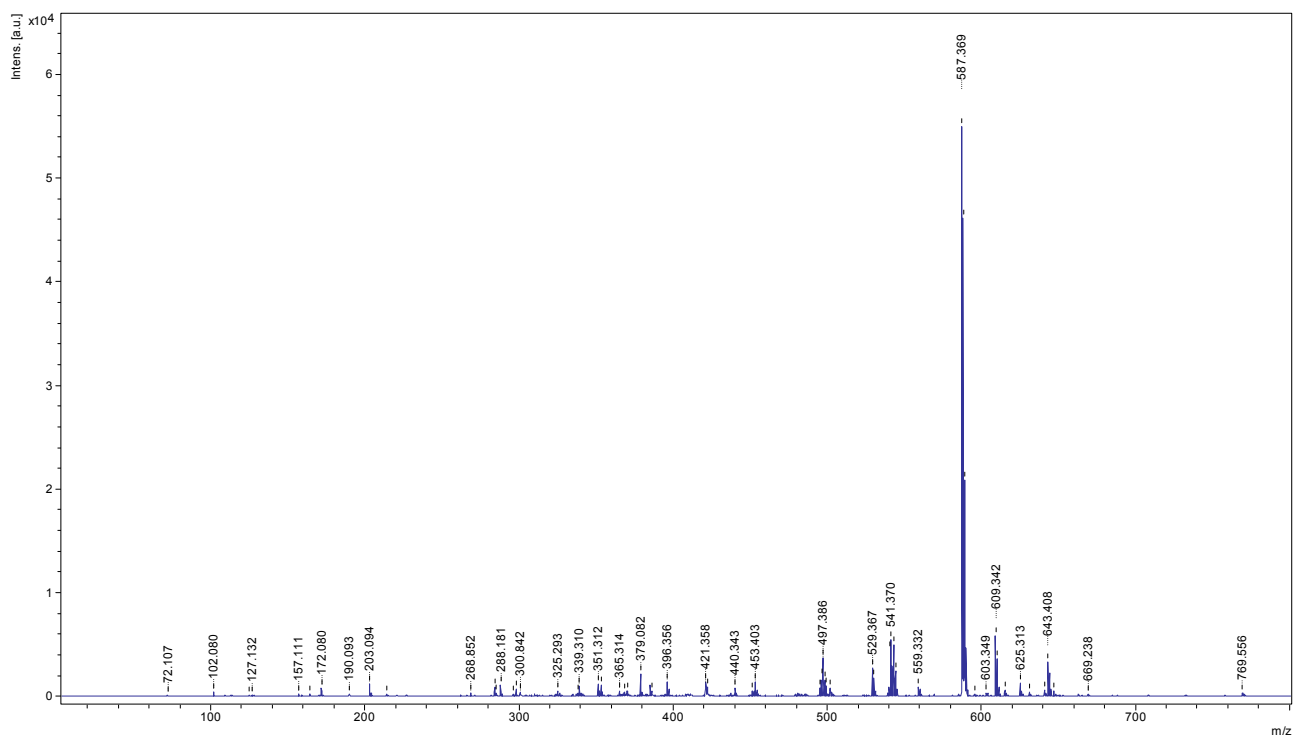

**Fig.S3 MALDI-TOF spectrum of HPDO3A-C16 ligand**

**Evaluation of CMC and hydrodynamic size.**

Hydrodynamic size and CMC have been evaluated by using Dynamic Light Scattering (pH 7.2, 25°C, in Saline Phosphate Buffer 1mM phosphate, 150mM NaCl).

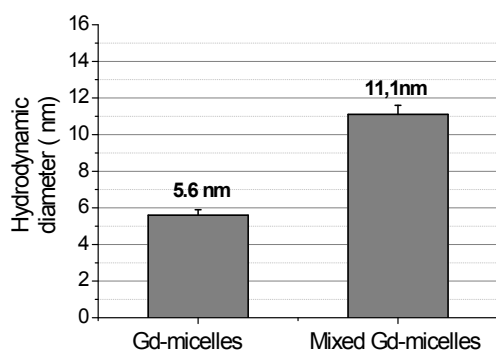

**Fig.S4 Mean hydrodynamic diameter for Gd-Micelles and Mixed-Gd-micelles as evaluated by Dynamic Light Scattering (Mean ± SEM).**

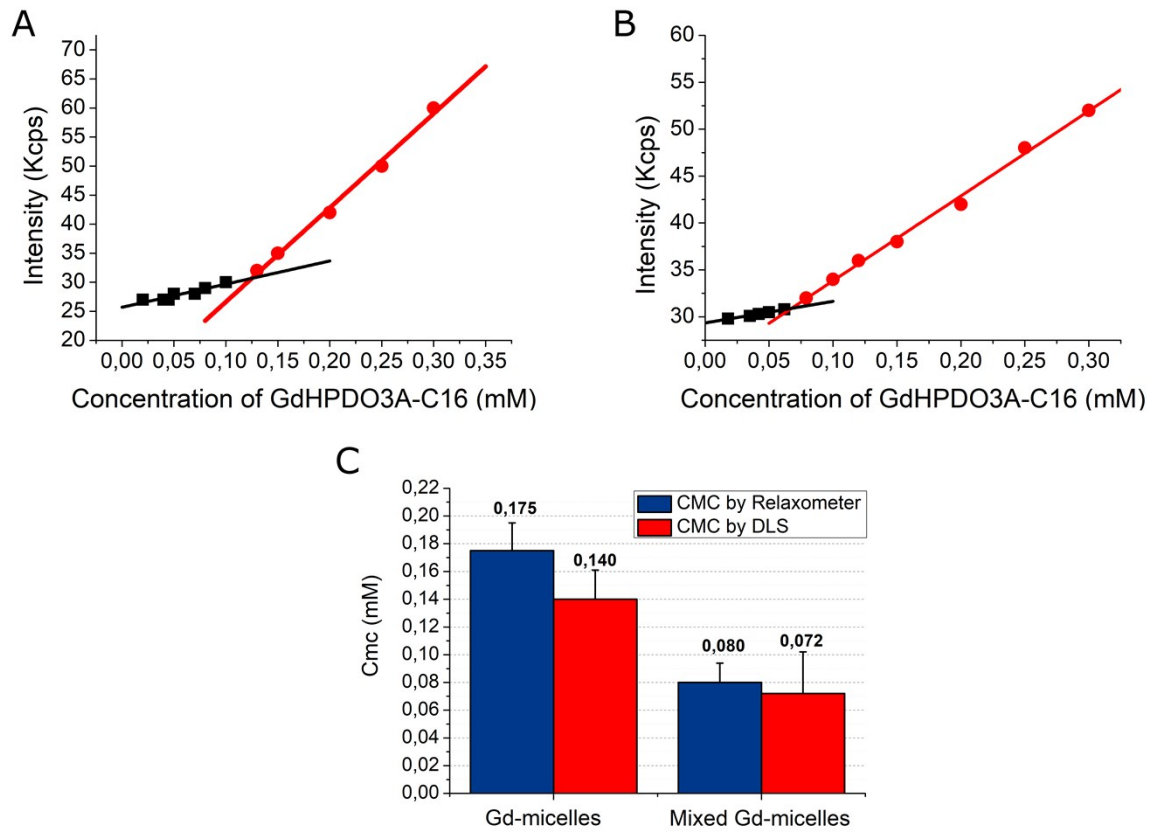

Fig.S5 Critical micellar concentration (CMC) evaluated by Dynamic Light Scattering (DLS) for Gd-micelles (A) and mixed Gd-micelles (B). (C) comparison between cmc evaluated by DLS and by relaxometric measurements.

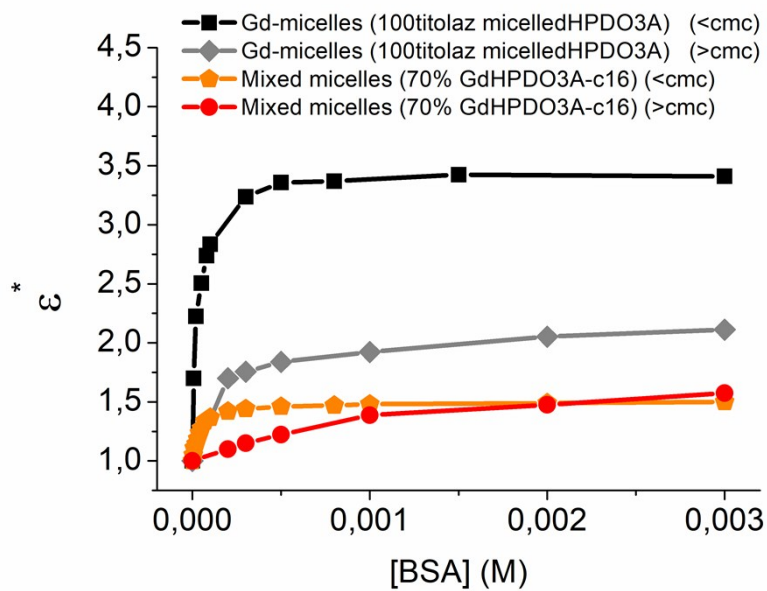

Fig.S6 Titration of micelles with BSA for GdHPDO3A-C16-micelles and mixed-Gd-micelles.

## Relaxometric characterization of Gd-HPDO3A-C16 micelles

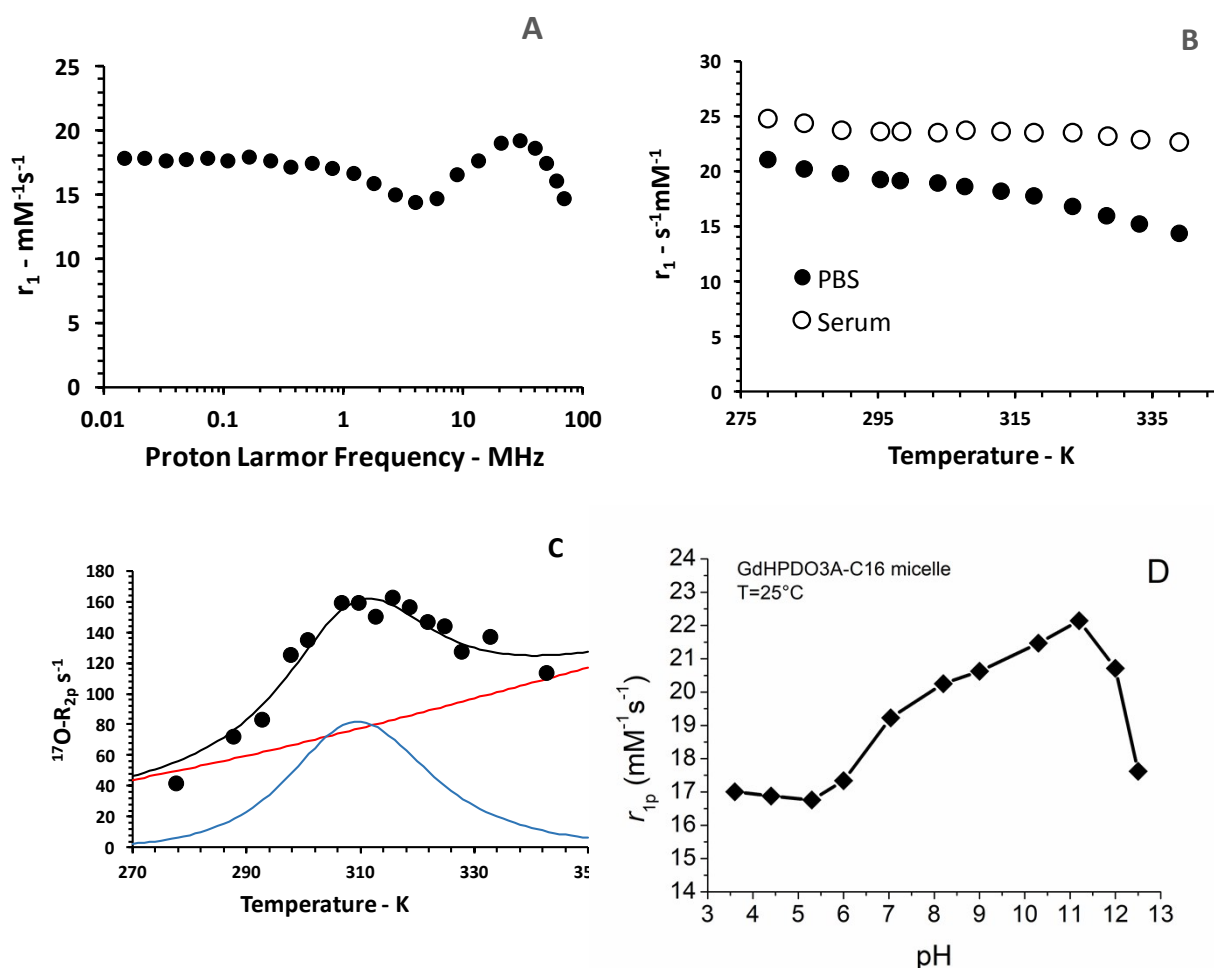

Fig.S7 (A)  $^1\text{H}$ -NMRD profiles of Gd-HPDO3A-C16 micelles in PBS (1 mM of Gd-complex), pH 7.0, 25°C; (B) Relaxivity at variable temperature for 1 mM Gd-HPDO3A-C16 micelles in PBS or human serum; (C) Transverse  $^{17}\text{O}$  NMR relaxation rates as a function of temperature for Gd-HPDO3A-C16 micelles recorded at 14.1 T. Data were analyzed with a model that considered the presence of two  $q = 1$  isomers for the Gd-complex. The red and blue lines represent the calculated contributions of the predominant (> 90%, slow exchanging water) and the minority (< 5%, intermediate exchange water) isomers; (D) Relaxivity of Gd-HPDO3A-C16 micelles at variable pH values.

## Hemolysis experiments

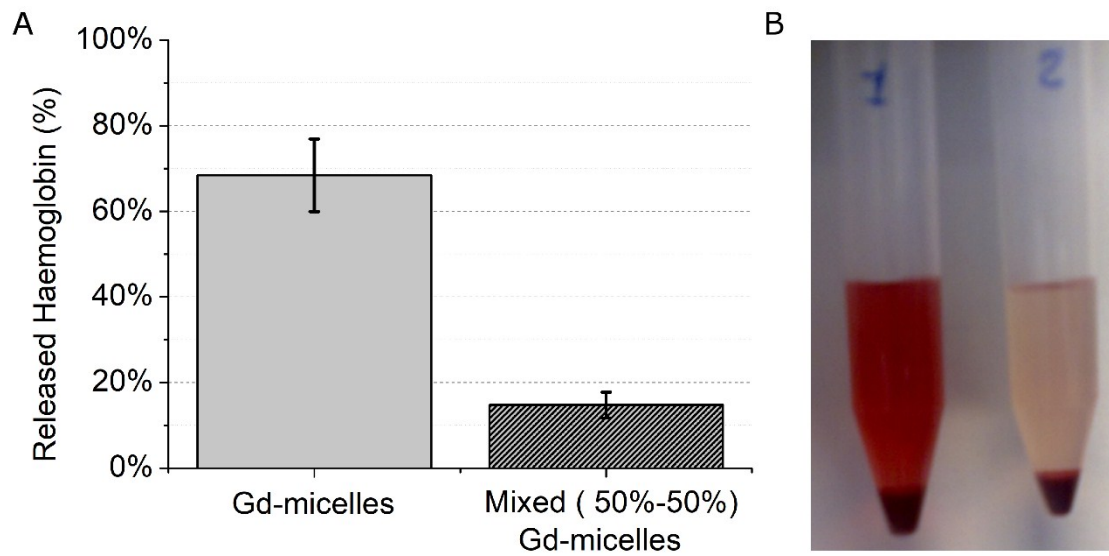

**Fig.S8 Haemolysis experiment: (A) Percentage of Hemoglobin released in the RBCs' suspension after incubation with Gd-micelles or mixed Gd-micelles (50%-50% ); (B) Representative tubes containing RBCs' pellet and supernatant with released Hemoglobin (left: incubated in presence of Gd-micelles, right: incubated in presence of mixed Gd-micelles)**
